# Supplementary material for: An expression database for roots of the model legume Medicago truncatula under salt stress
Source: PubMed Central journal article supplement (PMC2779821; doi:10.1186/1471-2164-10-517), 2009-11-11
Supplement: 1471-2164-10-517-S1.pdf [file 1471-2164-10-517-S1.pdf]

| Annotation |                 |
|------------|-----------------|
| PK         | <u>probe_id</u> |
| mttc       |                 |
| mttc_e     |                 |
| mttc_desc  |                 |
| mtpep_id   |                 |
| mtpep_e    |                 |
| mtpep_desc |                 |
| at_id      |                 |
| at_e       |                 |
| at_desc    |                 |

| AnnFromTC |              |
|-----------|--------------|
| PK        | <u>probe</u> |
| mttc      |              |
| mttc_e    |              |
| mttc_desc |              |

| AnnFromMtpep |              |
|--------------|--------------|
| PK           | <u>probe</u> |
| mtpep_id     |              |
| mtpep_e      |              |
| mtpep_desc   |              |

| AnnFromAt |              |
|-----------|--------------|
| PK        | <u>probe</u> |
| at_id     |              |
| at_e      |              |
| at_desc   |              |

| AnnFromTF |              |
|-----------|--------------|
| PK        | <u>probe</u> |
| td_id     |              |
| tf_e      |              |
| tf_family |              |

Tables for annotation information

| go_probe |               |
|----------|---------------|
| PK       | <u>GOterm</u> |
| GOname   |               |
| probe    |               |
| evidence |               |

Tables for GO annotation

| probe_go |              |
|----------|--------------|
| PK       | <u>probe</u> |
| GOterm   |              |
| GOname   |              |
| evidence |              |

Table for expression profile

| STEM_profile |              |
|--------------|--------------|
| PK           | <u>probe</u> |
| profile_id   |              |

Table for expression value

| experiment  |              |
|-------------|--------------|
| PK          | <u>probe</u> |
| salt_0h_fc  |              |
| salt_0h_pv  |              |
| salt_6h_fc  |              |
| salt_6h_pv  |              |
| salt_24h_fc |              |
| salt_24h_pv |              |
| salt_48h_fc |              |
| salt_48h_pv |              |
| profile_id  |              |

Table for genome information

| blat   |              |
|--------|--------------|
| PK     | <u>probe</u> |
| qstart |              |
| qend   |              |
| qsize  |              |
| chro   |              |
| strand |              |
| tstart |              |
| tend   |              |
| seq    |              |

| genebins   |                |
|------------|----------------|
| PK         | <u>BINCODE</u> |
| NAME       |                |
| NUMBER     |                |
| IDENTIFIER |                |

Tables for pathway information

| emtr_pathway |             |
|--------------|-------------|
| PK           | <u>emtr</u> |
| emtr_path    |             |

| kegg_emtr |              |
|-----------|--------------|
| PK        | <u>probe</u> |
| emtr      |              |
| evaluate  |              |
| emtr_desc |              |

| seq_mtprobe |                 |
|-------------|-----------------|
| PK          | <u>probe_id</u> |
| probe_desc  |                 |
| probe_seq   |                 |

| seq_mttc  |             |
|-----------|-------------|
| PK        | <u>mttc</u> |
| mttc_desc |             |
| mttc_seq  |             |

| seq_mtpep  |                 |
|------------|-----------------|
| PK         | <u>mtpep_id</u> |
| mtpep_desc |                 |
| mtpep_seq  |                 |

| seq_tairpep |              |
|-------------|--------------|
| PK          | <u>at_id</u> |
| at_desc     |              |
| at_seq      |              |

| seq_emtr  |             |
|-----------|-------------|
| PK        | <u>emtr</u> |
| emtr_desc |             |
| emtr_seq  |             |

Tables for sequence information
